# Supplementary material for: An approach for long-term, multi-probe Neuropixels recordings in unrestrained rats
Source: eLife journal article supplement (doi:10.7554/elife.59716), 2020-10-22
Supplement: supp [file elife-59716-supp-v1.zip]

Archive with 8 entries (8 files):
- elife_poa_e59716_Figure_4_figure_supplement_1.jpg
- elife_poa_e59716_Figure_4_figure_supplement_2.png
- elife_poa_e59716_Figure_4_figure_supplement_3.ai
- elife_poa_e59716_Figure_4_figure_supplement_4.ai
- elife_poa_e59716_Figure_4_figure_supplement_5.ai
- elife_poa_e59716_Figure_4_figure_supplement_6.ai
- elife_poa_e59716_Figure_5_figure_supplement_1.ai
- elife_poa_e59716_Transparent_Reporting_File.pdf
