# Supplementary figures and images for: An approach for long-term, multi-probe Neuropixels recordings in unrestrained rats
Source: eLife journal article supplement (doi:10.7554/elife.59716), 2020-10-22

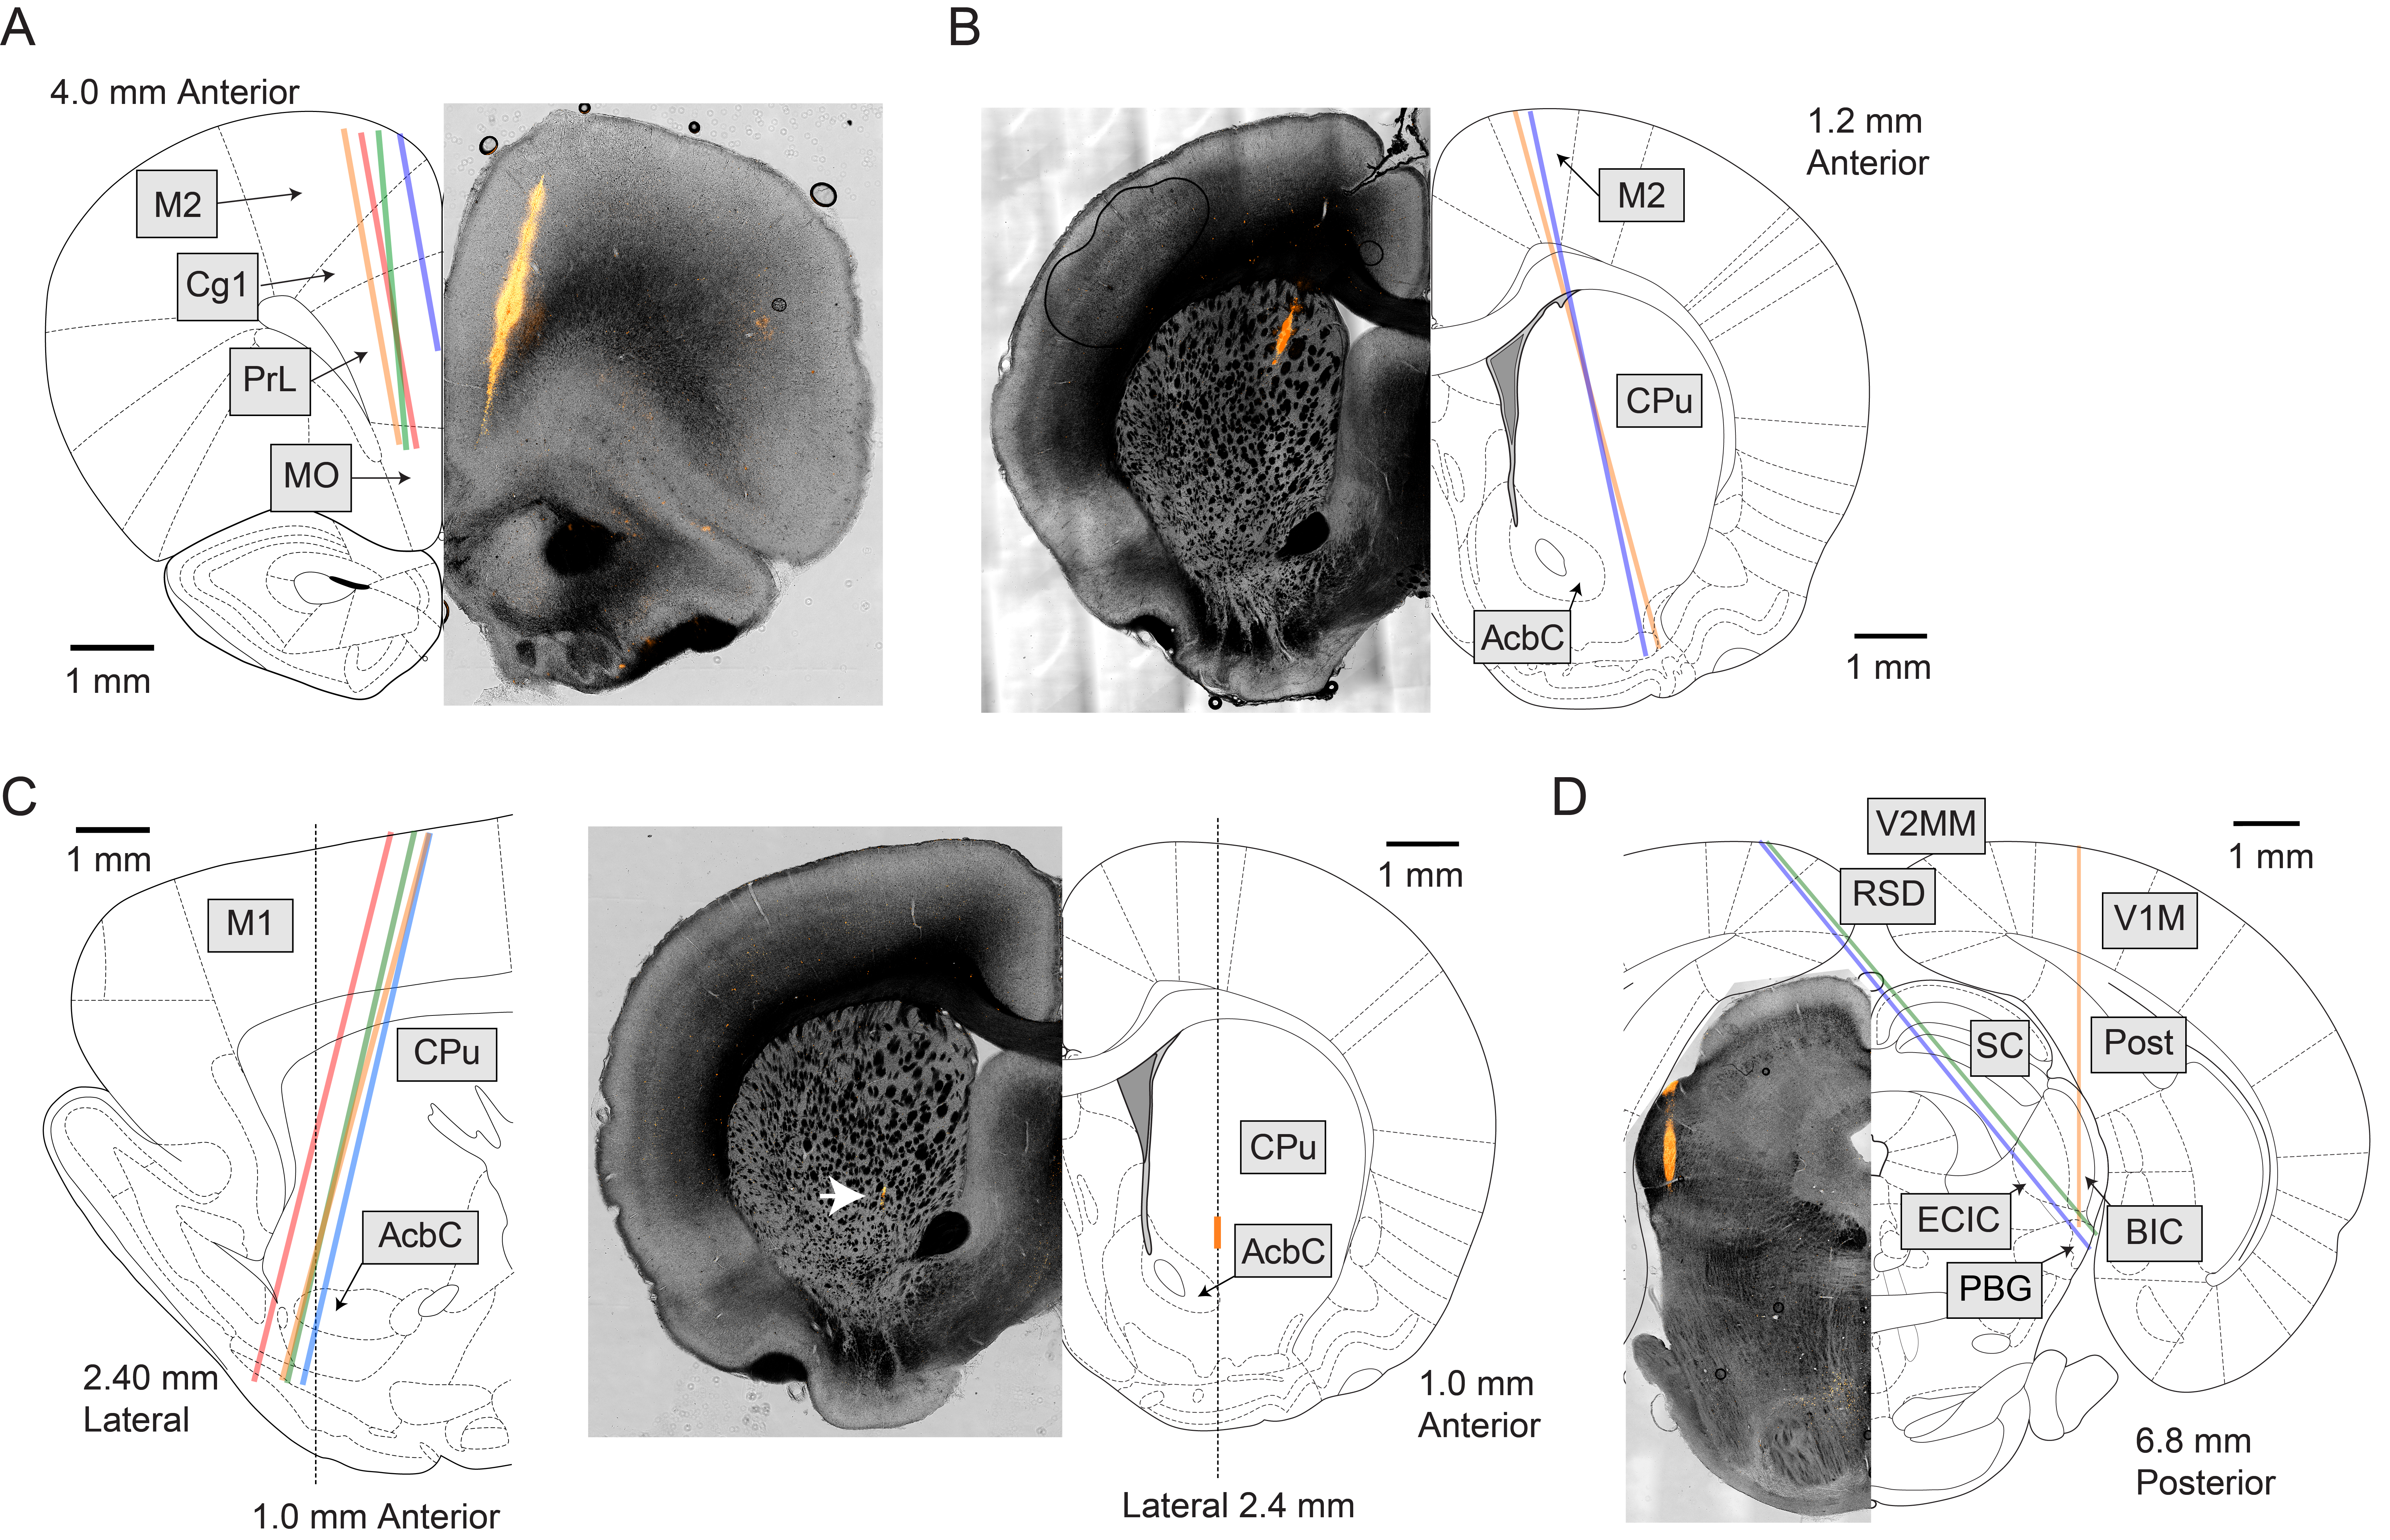

Supplement: supp [file elife-59716-supp-v1.zip › elife_poa_e59716_Figure_4_figure_supplement_1.jpg]

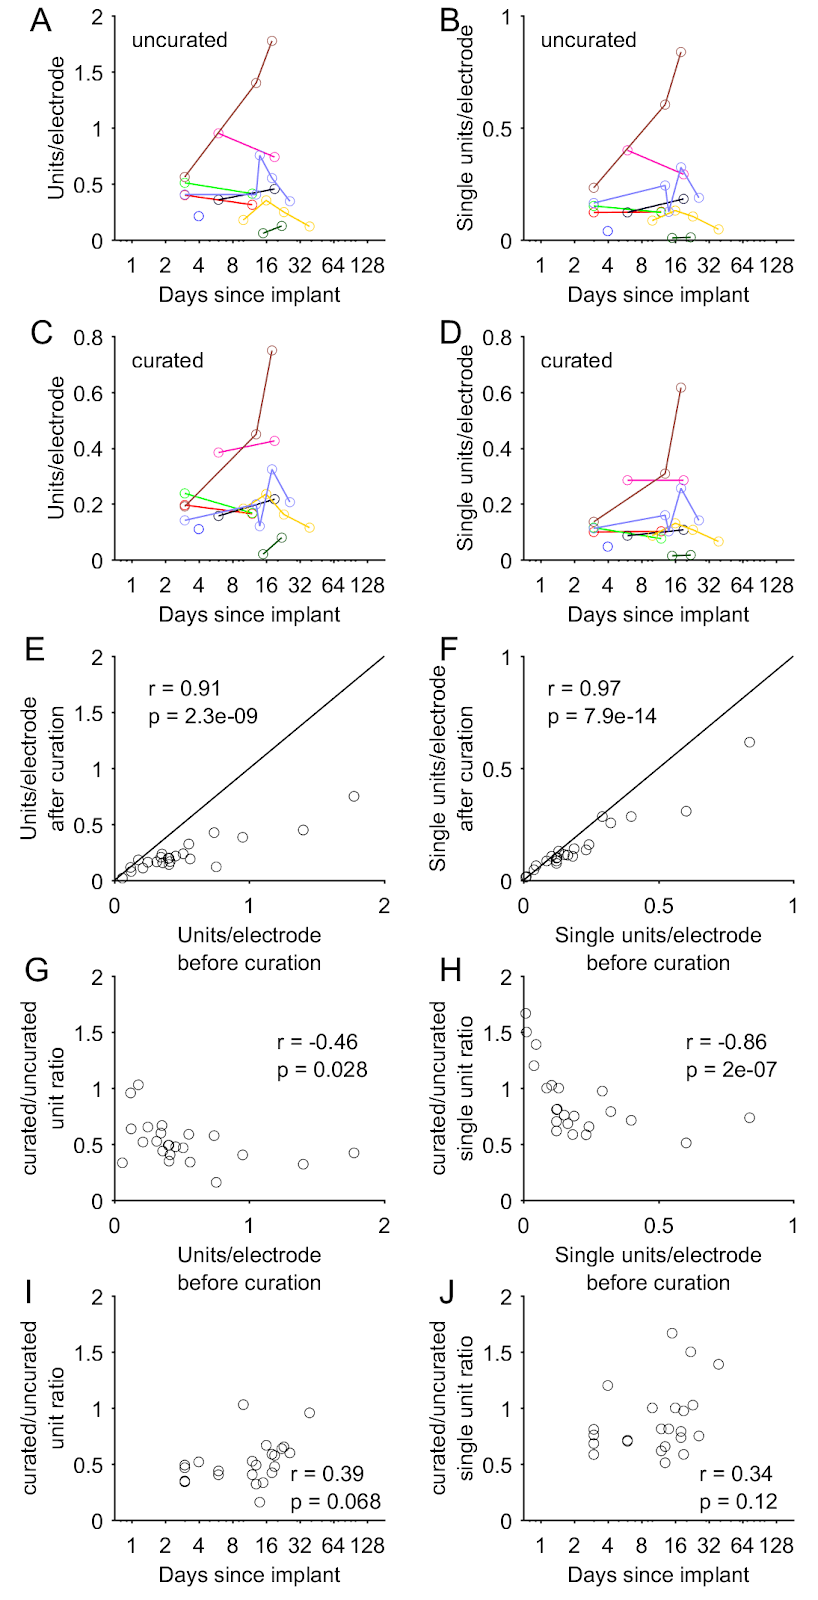

Supplement: supp [file elife-59716-supp-v1.zip › elife_poa_e59716_Figure_4_figure_supplement_2.png]
